# Supplementary material for: Multicenter Observational Study on Metastatic Non-Small Cell Lung Cancer Harboring BRAF Mutations: Focus on Clinical Characteristics and Treatment Outcome of V600E and Non-V600E Subgroups
Source: MDPI journal article supplement (doi:10.3390/cancers14082019), 2022-04-16
Supplement: s1 [file s1]

**Supplementary Table S1.** Patient Population Characteristics of the overall population and according to BRAF mutational status. SCC: Squamous Cell Carcinoma; ADC: Adenocarcinoma; NSCLC: Non-Small Cell Lung Cancer; NOS: Not Otherwise Specified, ECOG: Eastern Cooperative Group; TPS: Tumor Proportional Score.

| Patient characteristics    |                               | Overall<br>(n = 44) | BRAF V600E<br>(n = 23) | BRAF non-V600E<br>(n = 21) | Adjusted P-value* |
|----------------------------|-------------------------------|---------------------|------------------------|----------------------------|-------------------|
| Age, years (Median, range) |                               | 67 (47-84)          | 79 (47-81)             | 65 (49-84)                 | 0.808             |
|                            |                               | <b>n (%)</b>        |                        |                            |                   |
| Histotype                  | SCC                           | 1 (2)               | 1 (4)                  | 0 (0)                      | <b>0.144</b>      |
|                            | ADC                           | 36 (82)             | 17 (74)                | 19 (91)                    |                   |
|                            | NSCLC NOS                     | 7 (16)              | 5 (22)                 | 2 (9)                      |                   |
| Sex                        | Male                          | 28 (64)             | 16 (70)                | 12 (57)                    | 1.000             |
|                            | Female                        | 16 (36)             | 7 (30)                 | 9 (43)                     |                   |
| Smoking status*            | Smokers                       | 9 (24)              | 3 (14)                 | 6 (37)                     | <b>0.192</b>      |
|                            | Ex-Smokers                    | 23 (60)             | 13 (59)                | 10 (63)                    |                   |
|                            | Non Smokers                   | 6 (16)              | 6 (27)                 | 0 (0)                      |                   |
| ECOG PS                    | 0-1                           | 39 (89)             | 21 (91)                | 18 (86)                    | 1.000             |
|                            | 2                             | 5 (11)              | 2 (9)                  | 3 (14)                     |                   |
| Stage of the disease       | IIIB                          | 4 (9)               | 2 (9)                  | 2 (9)                      | 1.000             |
|                            | IV                            | 40 (91)             | 21 (91)                | 19 (91)                    |                   |
| Number of metastatic sites | < 3                           | 17 (39)             | 10 (43)                | 7 (33)                     | 1.000             |
|                            | ≥ 3                           | 27 (61)             | 13 (57)                | 14 (67)                    |                   |
| Metastatic Involvement     | Bone                          | 14 (32)             | 7 (30)                 | 7 (33)                     | 1.000             |
|                            | Brain                         | 8 (18)              | 3 (13)                 | 5 (24)                     | 1.000             |
|                            | Liver                         | 7 (16)              | 5 (22)                 | 2 (9)                      | 1.000             |
|                            | Lung                          | 20 (45)             | 11 (48)                | 9 (43)                     | 1.000             |
|                            | Lymph nodes                   | 32 (73)             | 15 (65)                | 17 (81)                    | 1.000             |
|                            | Adrenal gland                 | 5 (11)              | 4 (17)                 | 1 (5)                      | 1.000             |
|                            | Pleura                        | 14 (32)             | 9 (39)                 | 5 (24)                     | 1.000             |
| First-line Treatment       | Chemotherapy                  | 30 (68)             | 14 (61)                | 16 (76)                    | 0.486             |
|                            | Immunotherapy                 | 9 (21)              | 4 (17)                 | 5 (24)                     |                   |
|                            | Targeted therapy <sup>§</sup> | 5 (11)              | 5 (22)                 | 0 (0)                      |                   |
| PD-L1 status               | TPS ≥ 50%                     | 16 (37)             | 30 (23)                | 47 (28)                    | 1.000             |
|                            | 1% ≤ TPS < 50 %               | 7 (16)              | 42 (32)                | 59 (35)                    |                   |

|                    |         |         |         |
|--------------------|---------|---------|---------|
| <b>TPS &lt; 1%</b> | 8 (18)  | 51 (39) | 48 (29) |
| <b>Unknown</b>     | 13 (29) | 7 (6)   | 13 (8)  |

\* In 6 patients the data was not available

§ 4 patients were treated with Dabrafenib + Trametinib, 1 patient with Encorafenib + Binimetinib

*P values are referred to the comparison between BRAF V600E and non-V600E groups (Fisher's exact test for categorical variables; Mann Whitney test for continuous variables). \*Adjusted P values following Bonferroni correction.*

Please, note that when the product of the P values and the number of comparisons exceeds 1, the Bonferroni-corrected P value will be 1.000.

**Supplementary Table S2.** Explanatory prognostic factors in Cox proportional hazard models: uni- and multivariate analysis illustrating the impact on OS and PFS of clinico-pathological characteristics.

| OS,<br>Univariate analysis <sup>a</sup> | Overall |            |          |              | BRAF V600E |            |          |              | BRAF non-V600E |           |          |              |
|-----------------------------------------|---------|------------|----------|--------------|------------|------------|----------|--------------|----------------|-----------|----------|--------------|
|                                         | HR      | CI (95%)   | $\chi^2$ | P value*     | HR         | CI (95%)   | $\chi^2$ | P value*     | HR             | CI (95%)  | $\chi^2$ | P value*     |
| Age                                     | 1.05    | 1.01-1.10  | 5.73     | <b>0.023</b> | 1.02       | 0.96-1.08  | 0.54     | 0.477        | 1.07           | 1.01-1.15 | 4.75     | <b>0.030</b> |
| Histotype                               | 1.18    | 0.78-1.79  | 0.58     | 1.000        | 2.16       | 1.04-4.49  | 3.97     | <b>0.120</b> | 0.88           | 0.45-1.75 | 0.14     | 0.725        |
| Sex                                     | 0.51    | 0.22-1.21  | 2.40     | 0.110        | 0.48       | 1.14-1.70  | 1.49     | 0.255        | 0.61           | 1.18-2.01 | 0.69     | 0.414        |
| Smoking status                          | 1.06    | 0.53-2.10  | 0.03     | 0.869        | 1.32       | 0.54-3.23  | 0.38     | 0.539        | 1.24           | 0.29-5.29 | 0.08     | 0.772        |
| ECOG PS                                 | 4.17    | 1.38-12.63 | 4.77     | <b>0.011</b> | 1.39       | 0.18-11.04 | 0.09     | 0.754        | 18.6           | 3.0-75.68 | 8.89     | <b>0.002</b> |
| N of metastatic sites                   | 0.98    | 0.46-2.08  | 0.03     | 0.956        | 1.18       | 0.43-3.30  | 0.74     | 1.185        | 0.88           | 0.27-2.94 | 0.04     | 0.841        |
| Bone metastasis                         | 1.48    | 0.64-3.39  | 0.82     | 0.356        | 1.91       | 0.55-6.63  | 0.97     | 0.307        | 1.18           | 0.37-3.78 | 0.08     | 0.775        |
| Brain metastasis                        | 0.94    | 0.35-2.49  | 0.02     | 0.901        | 4.67       | 1.14-19.07 | 3.71     | <b>0.032</b> | 0.52           | 0.11-2.43 | 0.79     | 0.406        |
| Liver metastasis                        | 2.26    | 0.87-5.91  | 2.45     | 0.095        | 2.18       | 0.62-7.60  | 1.37     | 0.222        | 2.68           | 0.54-13.1 | 1.21     | 0.229        |
| Lymphnodes metastasis                   | 1.19    | 0.53-2.67  | 0.18     | 0.668        | 2.09       | 0.70-6.25  | 1.88     | 0.184        | 0.58           | 1.15-2.14 | 0.62     | 0.410        |
| Adrenal metastasis                      | 1.48    | 0.43-5.08  | 0.36     | 0.531        | 2.89       | 0.71-11.79 | 1.91     | 0.139        | 0.04           | 0.03-9.11 | 1.64     | 0.537        |
| I line treatment                        | 1.13    | 0.82-1.55  | 0.49     | 1.000        | 1.14       | 0.80-1.61  | 0.48     | 1.000        | 1.38           | 0.37-1.12 | 0.22     | 1.000        |
| PD-L1 status, TPS                       | 1.27    | 0.72-2.23  | 0.71     | 1.000        | 1.16       | 0.48-2.79  | 0.11     | 1.000        | 1.29           | 0.57-2.96 | 0.38     | 1.000        |

  

| PFS,<br>Univariate analysis <sup>a</sup> | Overall |          |          |          | BRAF V600E |          |          |          | BRAF non-V600E |          |          |          |
|------------------------------------------|---------|----------|----------|----------|------------|----------|----------|----------|----------------|----------|----------|----------|
|                                          | HR      | CI (95%) | $\chi^2$ | P value* | HR         | CI (95%) | $\chi^2$ | P value* | HR             | CI (95%) | $\chi^2$ | P value* |

|                       |      |            |      |              |      |           |      |       |      |            |      |              |
|-----------------------|------|------------|------|--------------|------|-----------|------|-------|------|------------|------|--------------|
| Age                   | 0.98 | 0.94-1.02  | 1.25 | 0.257        | 0.98 | 0.93-1.03 | 0.61 | 0.430 | 0.98 | 0.91-1.06  | 0.18 | 0.673        |
| Histotype             | 0.83 | 0.52-1.34  | 0.65 | 1.000        | 1.11 | 0.52-2.38 | 0.08 | 1.000 | 0.76 | 0.38-1.51  | 0.75 | 1.000        |
| Sex                   | 0.91 | 0.42-1.97  | 0.06 | 0.810        | 1.47 | 0.48-4.54 | 0.43 | 0.504 | 0.19 | 0.05-0.79  | 5.97 | <b>0.022</b> |
| Smoking status        | 1.44 | 0.77-2.68  | 1.32 | 0.762        | 0.89 | 0.37-2.17 | 0.06 | 1.000 | 1.61 | 0.54-4.82  | 0.71 | 1.000        |
| ECOG PS               | 3.56 | 0.42-29.84 | 1.02 | 0.242        | 8.64 | 0.78-15.8 | 2.21 | 0.079 | 0.04 | 0.01-7.89  | 0.35 | 0.776        |
| N of metastatic sites | 1.39 | 0.62-3.11  | 0.66 | 0.422        | 1.53 | 0.49-4.72 | 0.57 | 0.455 | 0.87 | 0.27-2.81  | 0.05 | 0.813        |
| Bone metastasis       | 2.60 | 1.16-5.81  | 5.09 | <b>0.020</b> | 2.22 | 0.64-7.69 | 1.45 | 0.209 | 2.60 | 0.89-7.56  | 2.99 | 0.079        |
| Brain metastasis      | 2.31 | 0.84-6.37  | 2.28 | 0.103        | 2.28 | 0.47-11.1 | 0.89 | 0.306 | 3.63 | 0.79-16.5  | 2.48 | 0.096        |
| Liver metastasis      | 1.19 | 0.47-2.99  | 0.13 | 0.714        | 1.75 | 0.51-6.03 | 0.73 | 0.378 | 0.99 | 0.21-4.54  | 0.01 | 0.986        |
| Lymphnodes metastasis | 0.96 | 0.43-2.15  | 0.01 | 0.925        | 0.99 | 0.33-2.99 | 0.01 | 0.993 | 2.17 | 0.04-2.78  | 4.35 | <b>0.023</b> |
| Adrenal metastasis    | 1.60 | 0.54-4.75  | 0.65 | 0.395        | 0.48 | 0.61-9.01 | 1.43 | 0.204 | 1.37 | 0.17-11.09 | 0.08 | 0.766        |
| I line treatment      | 0.79 | 0.51-1.21  | 1.48 | 0.834        | 0.87 | 0.56-1.33 | 0.48 | 1.000 | 0.63 | 0.14-2.82  | 0.41 | 1.000        |
| PD-L1 status, TPS     | 0.72 | 0.40-1.28  | 1.21 | 0.801        | 0.69 | 0.26-1.83 | 0.53 | 1.000 | 0.96 | 0.44-2.09  | 0.01 | 1.000        |

PFS: progression free survival; OS: overall survival; Age (continue variable), Histotype (SCC=0, ADC=1, NOS=3), Smoking status (negative smoking history=0, positive smoking history=1), Sex (Male=0, Female=1), Eastern Cooperative Oncology Group performance status (ECOG PS, 0-1 vs 2), number of metastatic sites (< 3 = 0, ≥ 3 = 1), bone/brain/liver/lymphnode/adrenal gland metastasis (absence=0, presence=1), first line treatment (chemotherapy=0, immunotherapy=1, chemo-immunotherapy=2), PD-L1 status (TPS < 1% = 0, 1-49% = 1, ≥ 50% = 2);

Statistical results with **P** < 0.05 are bolded.

a Univariate analysis is carried out without any adjustment.

\*Adjusted P values following Bonferroni correction.

Please, note that when the product of the P values and the number of comparisons exceeds 1, the Bonferroni-corrected P value results 1.000.
